# Supplementary material for: Manipulating the intermolecular stacking of polymeric donors for efficient organic solar cells
Source: Royal Society of Chemistry journal article supplement (doi:10.1039/d1tc03842g), 2021-01-01
Supplement: d1tc03842g1.pdf [file d1tc03842g1.pdf]

# Manipulating the Intermolecular Stacking of Polymeric Donors for Efficient Organic Solar Cells

Yong Zhao <sup>a#</sup> and Lu Yu <sup>a, c#</sup>, Yonghai Li <sup>c\*</sup>, Xiao Kang <sup>a, b</sup>, Xichang Bao <sup>c</sup>, Renqiang Yang <sup>c, d</sup>,

Mingliang Sun <sup>a, b, e\*</sup>

<sup>a</sup> School of Materials Science and Engineering, Ocean University of China, Qingdao 266100, China.

E-mail: mlsun@ouc.edu.cn

<sup>b</sup> Open Studio for Marine Corrosion and Protection, Pilot National Laboratory for Marine Science and Technology (Qingdao), Qingdao, 266100, China

<sup>c</sup> CAS Key Laboratory of Bio-based Materials, Qingdao Institute of Bioenergy and Bioprocess Technology, Chinese Academy of Sciences, Qingdao 266101, China. E-mail: liyh@qibebt.ac.cn

<sup>d</sup> Key Laboratory of Optoelectronic Chemical Materials and Devices (Ministry of Education), School of Chemical and Environmental Engineering, Jiangnan University, Wuhan 430056, China.

<sup>e</sup> Institute of Polymer Optoelectronic Materials and Devices, State Key Laboratory of Luminescent Materials and Devices, South China University of Technology. Guangzhou 510640, China

# Yong Zhao and Lu Yu contribute equally to this work.

## 1. Materials and synthesis

### 1.1 Materials

All reagents and chemicals were purchased from TCI Co., Sigma-Aldrich Co., and Alfa Aesar Co. and were used without further purification unless otherwise stated. The acceptor material ITIC was purchased from Derthon Co.

### 1.2 Synthesis

*Chemical 1*: The synthesis process was according to previous reports (F, A. Arroyave, C. A. Richard, J. R. Reynolds, *Org. Lett.*, **2012**, 14, 6138; S. L. Fronk, Y. Shi, M. Siefrid, and et. al., *Macromolecules*, **2016**, 49, 9301). The synthetic details of *fused*-DTBTz and 2Br *fused*-DTBTz were according to our previous work (L. Yu, Y. Li, Y. Wang, and et. al., *ACS Appl. Mater. Inter.* **2019**, 11, 31087), and the synthetic details polymers are listed below:

*fused-DTBTz*: 1.2 g (5.21 mmol) Chemical 1 and 0.7 g (6.25 mmol) t-BuOK were dissolved in 10 mL THF and refluxed for 1 h. Then 1.12 mL (6.22 mmol) 9-(bromomethyl)nonadecane was added to the solution and refluxed for additional 14 h. After the completion, the mixture was extracted three times with dichloromethane (DCM) and dried with anhydrous Na<sub>2</sub>SO<sub>4</sub>. The solvent was removed by rotary evaporator. The crude product was subjected into silica gel column chromatography with petroleum ether as eluent to give compound *fused-DTBTz* as yellow oil (44%).

*2Br fused-DTBTz*: 0.3 g (0.58 mmol) *fused-DTBTz* was added to a mixture of 20 mL N, N-dimethylformamide and 0.5 mL acetic acid. Then 0.23 g (1.29 mmol) N-bromosuccinimide was added in small portions. After the completion, the mixture was extracted three times with DCM and dried with anhydrous Na<sub>2</sub>SO<sub>4</sub>, and the solvent was removed by rotary evaporator. The crude product was subjected into silica gel column chromatography with petroleum ether as eluent to give *2Br fused-DTBTz* as light-yellow solid (90%).

*PY3*: 100.4 mg (0.15 mmol) *2Br fused-DTBTz*, 135.7 mg (0.15 mmol) 2F-BDT-Sn, and 8.7 mg (0.0075 mmol) Pd(PPh<sub>3</sub>)<sub>4</sub> were put into a flame-dried and Argon-filled flask. After adding 10 mL dried toluene, the solution was purged with argon for 30 min. Then the solution was heated to 110 °C and refluxed for 24 h under an Ar atmosphere. After cooling to room temperature, the solution was dropped into 100 mL methanol and filtered, followed by Soxhlet extraction successively with methanol, acetone, hexane and hexane/dichloromethane (v/v=2:1) as the solvents to remove the residual monomers, oligomers and low-weight polymers. The final polymer was collected using CHCl<sub>3</sub> as the eluent and precipitated against methanol. The residue was filtered and dried in a vacuum oven at 45 °C to afford *PY3* as red solids (79%).

*PY4*: The synthesis was prepared by using a similar synthetic procedure described above for *PY3*. The final polymer was collected using CHCl<sub>3</sub> as the eluent and precipitated against methanol. The residue was filtered and dried in a vacuum oven at 45 °C to afford *PY4* as red solids (61%).

## 2. Characterization and methods

## 2.1 Device fabrication

All devices are the conventional structure of ITO/PEDOT:PSS/BHJ/PDINO/Al fabricated in the glove box. ITO substrates (sheet resistance = 15  $\Omega$ /square) were ultrasonically washed by deionized water, acetone, and isopropanol, and the dried ITO was subjected to UV/ozone treatment. The aqueous solution of PEDOT:PSS was spin-coated on the ITO substrate at 4000 rpm for 30 s, and annealed at 150 °C for 15 min. PY3 and PY4:ITIC-2F were dissolved in chloroform at a weight ratio of 1:1.5 (total 24 mg mL<sup>-1</sup>). The PY3 and PY4:ITIC-2Cl were dissolved in chlorobenzene to ensure a weight ratio of 1:1.25 (22.5 mg mL<sup>-1</sup>). The blend was spin-coated on PEDOT:PSS with a thickness of about 100-140 nm, and annealed at 130 °C or 140 °C for 10 min. PDINO was dissolved in methanol with the concentration of 1 mg mL<sup>-1</sup> to form the electron transfer layer. Finally, 60 nm thick Al was evaporated to complete the device, and the active area of each device is 0.1 cm<sup>2</sup>.

## 2.2 Instrumentation

<sup>1</sup>H NMR and <sup>13</sup>C NMR were performed on a Bruker Advance III 600 MHz instrument with CDCl<sub>3</sub> as the solvent and tetramethylsilane as the internal reference. The absorption spectra were measured by Shimadzu UV-vis 2550 scanning spectrophotometer. TGA measurement was recorded using a SDT Q600 V20.9 Build 20 at a heating rate of 10 °C min<sup>-1</sup> under a nitrogen atmosphere. Gel permeation chromatography (GPC) was performed with trichlorobenzene as eluent and polystyrene was used as the standard. CV was measured by the electrochemical workstation (CHI660E) in a three-electrode electrochemical cell (Pt wire as a counter electrode, glassy carbon electrode as working electrode, and Ag/AgCl electrode as a reference electrode). CV measurements were carried out in anhydrous acetonitrile containing 0.1 M n-Bu<sub>4</sub>NPF<sub>6</sub> as a supporting electrolyte under an argon atmosphere at a scan rate of 100 mV s<sup>-1</sup> assuming that the absolute energy level of Fc/Fc<sup>+</sup> was -4.80 eV. The surface morphology of films was investigated by AFM (Agilent AFM 5400). TEM were measured by using a HITACHI H-7650 electron microscope with an acceleration voltage of 100 kV. Film thickness of the devices was determined by the profilometer (Veeco Dektak 150).



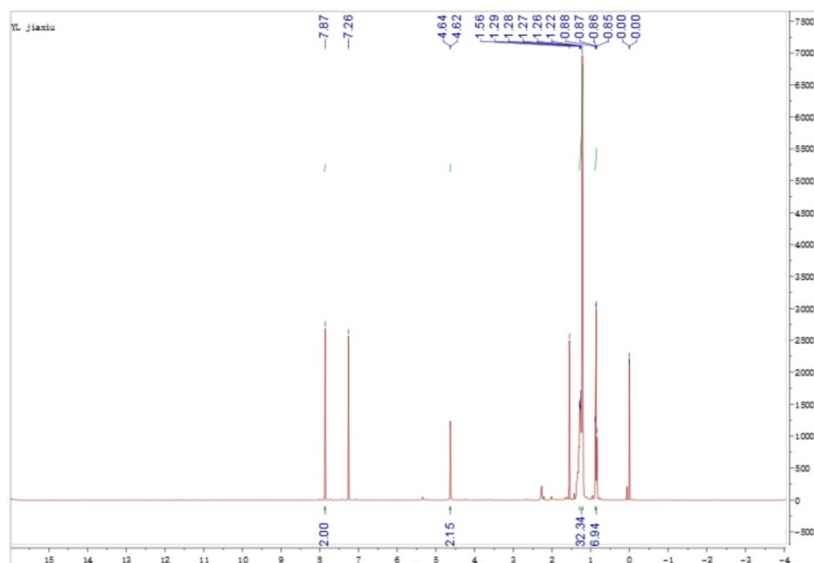

**Figure S1.**  $^1\text{H}$  NMR spectra of *fused-DTBTz* and *2Br fused-DTBTz*.

**Table S1. The Photovoltaic Parameters of the Optimal Device with PY3:IT-4Cl, PY3:IT-4F, PY4:IT-4Cl and PY4:IT-4F under Different Conditions**

| Blend      | D/A<br>(w/w) | Annealing<br>( $^{\circ}\text{C}$ ) | $V_{oc}$<br>(V) | $J_{sc}$<br>( $\text{mA cm}^{-2}$ ) | $FF$<br>(%) | $\text{PCE}_{\text{max}}$<br>(%) |
|------------|--------------|-------------------------------------|-----------------|-------------------------------------|-------------|----------------------------------|
| PY3:IT-4Cl | 1:1          | 140                                 | 0.832           | 17.16                               | 68.7        | 9.82                             |
| PY3:IT-4Cl | 1:1.25       | 140                                 | 0.780           | 19.31                               | 71.4        | 10.75                            |
| PY3:IT-4Cl | 1:1.5        | 140                                 | 0.810           | 19.53                               | 70.2        | 11.10                            |
| PY3:IT-4Cl | 1:1.5        | 130                                 | 0.798           | 19.09                               | 73.5        | 11.20                            |
| PY3:IT-4F  | 1:1.5        | no                                  | 0.909           | 17.15                               | 65.6        | 10.22                            |
| PY3:IT-4F  | 1:1.5        | 130                                 | 0.891           | 18.01                               | 65.5        | 10.51                            |
| PY4:IT-4Cl | 1:1.25       | 130                                 | 0.817           | 21.12                               | 70.3        | 12.14                            |
| PY4:IT-4F  | 1:1.25       | 130                                 | 0.874           | 20.26                               | 70.7        | 12.51                            |
